# Supplementary material for: Yeast GH30 Xylanase from Sugiyamaella lignohabitans Is a Glucuronoxylanase with Auxiliary Xylobiohydrolase Activity
Source: MDPI journal article supplement (doi:10.3390/molecules27030751), 2022-01-25
Supplement: s1 [file s1]

**Supplementary material** for the following manuscript:

**Yeast GH30 xylanase from *Sugiyamaella lignohabitans* is a glucuronoxylanase with auxiliary xylobiohydrolase activity**

by Katarína Šuchová, Andrej Chyba, Zuzana Hegyi, Martin Rebroš and Vladimír Puchart.

*TcXyn30B*

1 10 20 30 40 50

β1X β1

*TcXyn30A* mrhp...ipilavlgra **sa**..WSYSQT..LSAN **IQ**VNALQR **YQ**EMIGGGCS **SG**AFGW **AC**QQQFPTT  
*TrXynIV* mkss...isvvlallghs **aa**..wsyaTKSQYRAN **IK**INARQT **YQ**TMIGGGCS **SG**AFGI **AC**QQQFGSS  
*AaXyn30A* mrsasviaaaavaslapl **aaa**TDLDPCVDEIVTE **IE**IRPDIK **HQ**QIEGGGFS **SG**AF **RA**QLL...L  
*TpXynC* mhlsl...iidklfllgal **var**vta.TPTSSSGIS **VS**VNPKVQ **FO**EVDFGGS **QAF** **RA**EDIFGKY  
*TcXyn30B* .....mvfskvav **aa**sals.lgayaIDAQ **IN**VDLQAR **YQ**SVDFGGS **QAF** **RA**EDIFGKY  
*BXylD* ..ms...iwt...watpsi **ast**vlaNSLSSPTT **IT**VDANEE **KQ**IVDGF **GF**SEAF **RA**ENVFGSA  
*TtXyn30A* mysl...liall...cagt **av**.daqaLQQRQAGTT **LT**VDLSST **YQ**RIDGFGT **SE**AF **RA**VQM...S  
*SLXyn30A* mkls...ltfltlsls.t **al**.....aSAPAPVA **VD**INLAQT **YQ**EIDGFG **GF**SEAF **RA**NDL...Y  
*TrXynVI* ...m...ialv...pfv **ii**..agaatlsvaQTT **IT**VN **VS**GSK **FQ**QIDGFG **GF**SEAF **RA**REF...Q  
*TcXyn30C* mws.....lk...snst **al**avalngi.valgQT **IT**VNPSTT **YQ**TIDGFG **GF**SEAF **RA**GAPI...A  
*TLXyn30A* mssr...ialatl laqv **al**aAPRDQLVARQTT **AT**INLSQT **YQ**TMDGFG **GF**SEAF **RA**NDL...Y

1 10 20 30 40 50

*TcXyn30B*

60 70 80 90 100 110

α1 β2

*TcXyn30A* GLTPEN **QEEV** **TKILF** DENI **G**.GLSIVRN **DIGSS** PG.....S **TL**PTCPAT **PAG**PFN **YQ**WD **GS**D  
*TrXynIV* GLSPEN **QQKV** **TQILF** DENI **G**.GLSIVRN **DIGSS** PG.....T **TL**PTCPAT **PQ**DKFD **YV**WD **GS**D  
*AaXyn30A* NVTQDT **QQEL** **LDLIY** NRET **GL**GFSILRN **GIGSS** NS **SY**NDWMN **TL**LPES **PG**SPDGEFN **YV**WD **EY**D  
*TpXynC* GLPAVN **QSLV** **LDLLY** NENV **GAG**FTILRN **GIGSS** NT **SS**SNFMN **SI**EPKN **PG**GPNAIPE **YV**WD **HY**N  
*TcXyn30B* GLSPKN **QSYV** **LDLMY** SEER **GAG**FTILRN **GIGSS** NS **ST**SNLMN **SI**EPFS **PG**SPSTPN **YV**WD **HY**N  
*BXylD* GLSPAN **QQRL** **LDLMY** DENI **GAG**FTILRN **GIGSS** NL **SD**PSDMI **SI**ELTD **PG**LPSSKPT **YTP**.NNN  
*TtXyn30A* RLPEEG **QRRR** **LDVLF** STTN **GAG**LSILRN **GIGSS** PD **MS**SDHMS **SI**APKS **PG**SPNNPLI **YS**WD **GS**D  
*SLXyn30A* HMPEAG **RRKA** **LDLLF** HPTK **GAG**FSTIRN **GIGSS** PN **SS**SNWMN **SI**EPVS **PG**GPNSPPH **YV**WD **RN**D  
*TrXynVI* SANATA **QKAL** **LDLLF** STST **GAG**FSTIRN **RIGSG** GA.....GD **SI**EPNN **PG**SPSAAPN **YV**WD **NN**D  
*TcXyn30C* SASASI **QTQV** **TNYLF** STTT **GAG**LTILRN **RI**AAGS .....G **SI**EPNA **PG**SPNAQPT **YT**WD **GN**D  
*TLXyn30A* NLPSSQ **RQYA** **LDLLF** STTN **GAG**MTILRN **RIGSG** GT.....GD **SI**EPNS **PG**SPSATPN **YV**WD **GS**D

60 70 80 90 100 110

*TcXyn30B*

120 130 140 150 160 170

α2 β3

*TcXyn30A* **SC**QFNLTK **TA**LKYN **PE**LY **VY**AN **AW**SAPGCMKT **VT**GTEN **GG**Q **IC**GV **RG**T.....N **CT**.YDWR **QAY**  
*TrXynIV* **NC**QFNLTK **TA**LKYN **PN**LY **VY**AD **AW**SAPGCMKT **VT**GTEN **LG**Q **IC**GV **RG**T.....D **CK**.HDWR **QAY**  
*AaXyn30A* **SG**QF **FL**AKK **AV**.EY **G**VERI **YI**AN **AW**SAPGFMKNN **AD**DAN **GG**LL **LC**GV **VP**SFDGNSA **CE**.HDWR **QAY**  
*TpXynC* **SG**QF **PL**AQ **QAY**.SR **GL**HTL **YI**AN **AW**SAPGYMKTN **DN**ENN **GG**YL **LC**GVANE.....S **CAS**GNW **QAY**  
*TcXyn30B* **SG**QF **PL**SK **QAY**.AR **GL**PY **YI**AD **AW**SAPGYMKTN **QD**ENW **SG**FL **LC**GI **EG**E.....T **CPS**GDWR **QAY**  
*BXylD* **TG**QL **PL**AK **QAY**.AR **GL**KT **YI**AD **AW**SAPWFMKTN **LN**DND **GG**YL **LC**GV **ED**T.....D **CPT**GSW **QAY**  
*TtXyn30A* **NK**QL **WV**SQ **EA**VHTY **G**VKT **YI**AD **AW**SAPGYMKTN **GN**DAN **GG**TL **LC**GL **SG**A.....Q **CAS**GDWR **QAY**  
*SLXyn30A* **SS**QF **WFA**Q **QAV**.SY **G**VKT **YI**AD **AW**SAPGFMKTN **DN**ENY **GG**YL **LC**GV **RD**T.....N **CAS**GDWR **QAY**  
*TrXynVI* **SG**QL **WFT**Q **QAV**.SY **G**VKT **YI**AD **AW**GAPGFMKTS **GS**DSS **PG**YL **LC**GT **TG**H.....S **CSS**GDWR **QAY**  
*TcXyn30C* **AG**QV **WWS**K **QAR**.AK **G**VKY **YI**AD **AW**SAPAFMKTN **DN**VAN **GG**YL **LC**GT **TG**E.....T **CSS**GDWR **QAY**  
*TLXyn30A* **TI**NQV **WVT**Q **QAV**.SY **G**VKT **YI**AD **AW**SAPGFMKTN **ND**QNN **GG**YL **LC**GV **QNE**.....T **CAS**GNW **QAY**

120 130 140 150 160 170

*TcXyn30B*

180 190 200 210 220 230

α3 β4 α4

*TcXyn30A* **AD**YL **VQ**YV **KF**YQAE **GI**D **IS**LGAWN **EP**DFNPVT **YE**SME. **SD**GF **Q**.AK **DF**LE **IL**YP **TV**KKAF **PN**.  
*TrXynIV* **AD**YL **VQ**YV **RF**YKEE **GI**D **IS**LGAWN **EP**DFNPFT **YE**SML. **SD**GY **Q**.AK **DF**LE **VL**YP **TL**KKAF **PK**.  
*AaXyn30A* **AD**YL **VK**YI **QI**YAAE **GI**P **IS**DVAV **IN**EPDLT.TSY **AS**MR. **SNA**E. **VAD**FL **PI**LH **KT**LE **DAG**LD.  
*TpXynC* **AN**YL **VQ**YAR **F**YKES **GV**RV **TH**LGFL **NE**PQFA.AT **YAG**ML. **SNG**T **Q**.AAEF **IR**VL **AK**TV **KK**SGLD.  
*TcXyn30B* **AD**YL **VQ**YV **KF**YAES **GV**PT **TH**LGFL **NE**PQEV.VS **YAS**MG. **SNG**T **Q**.AAEF **VK**IL **GQ**TL **ER**GID.  
*BXylD* **VN**YL **LE**YV **KL**YKEA **GV**TV **TV**NV **GF**LN **NE**PQLN.TS **YAS**MQ. **SNG**T **Q**.AAEF **IR**VL **GR**TI **RE**QGLD.  
*TtXyn30A* **AD**YL **TK**YV **EF**YQES **NV**TV **TH**LGFL **NE**PELT.TS **YAS**MR. **SAS**Q. **AAEF** **IR**IL **YP**TI **QK**SNLT **Y**  
*SLXyn30A* **AN**YL **VQ**YI **KF**YKES **GI**D **IT**HV **GF**LN **NE**PEYN **PG**GY **YAG**ML. **SSG**F **Q**.AADF **IK**VL **YP**TI **QRA**GLST  
*TrXynVI* **AN**FL **VQ**YV **KY**YAAA **GY**NI **TH**LGFL **NE**PDYQ.TT **YS**OM **QI**SSNA **QEA**IS **FI**PL **SS**TV **KA**AGLN.  
*TcXyn30C* **AN**YL **VQ**YI **KD**YANE **GI**TI **ID**FV **GW**LN **NE**PDYS.PN **YD**SML **IT**SGT **Q**.AASF **IP**TL **YN**TI **KS**AGLS.  
*TLXyn30A* **AN**FL **VQ**YI **KD**YKSE **GL**DI **TH**VGFL **NE**PDYV.AS **YS**SM **Q**.**SDG**Y **Q**.AADF **IK**VL **YP**TI **QSA**GLG.

180 190 200 210 220 230

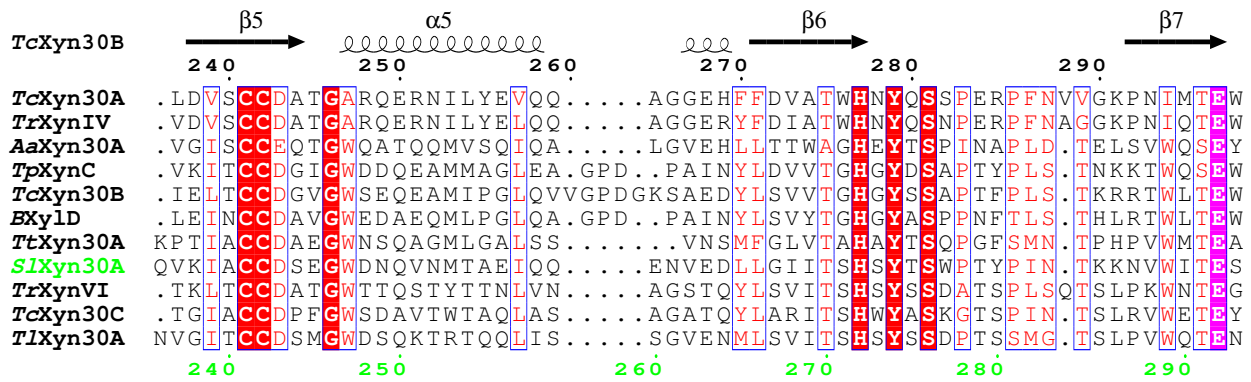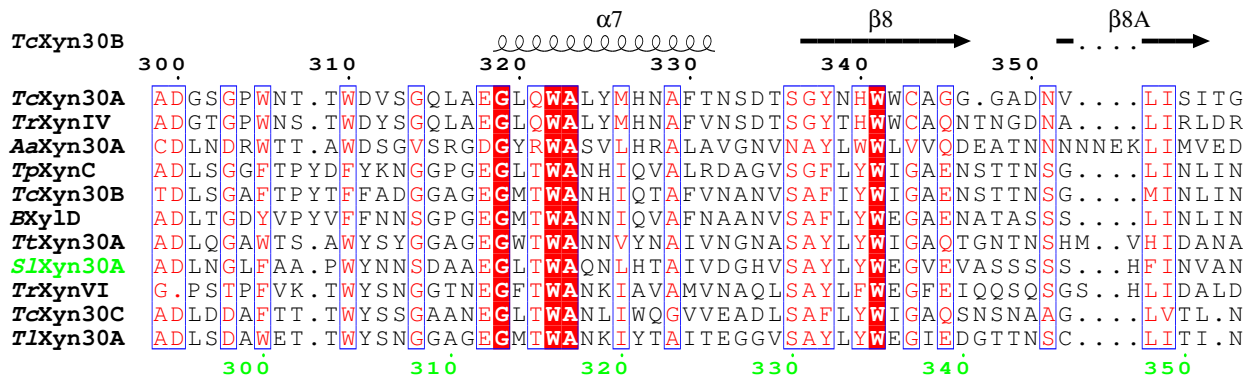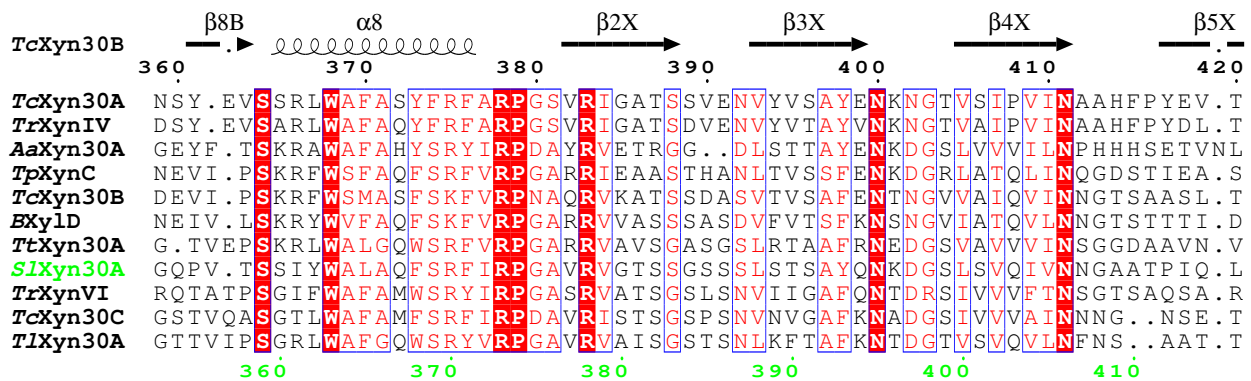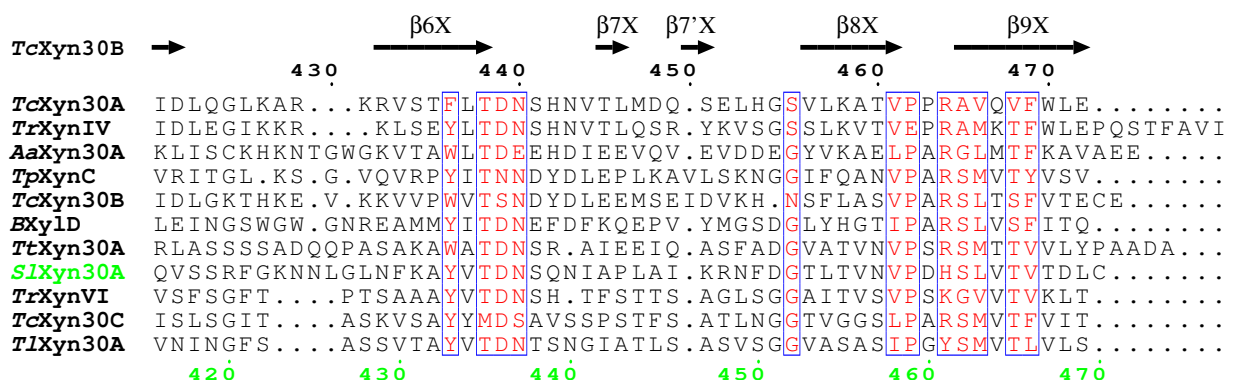

**Figure S1.** Multiple sequence alignment of *SlXyn30A* and all characterized eukaryotic GH30\_7 xylanases, namely *Talaromyces cellulolyticus* *TcXyn30B* (GAM36763.1), *TcXyn30C* (GAM40414.1), *TcXyn30A* (GAM43270.1), *Thermothelomyces thermophila* *TtXyn30A* (AEO55025.1), *Talaromyces purpureogenus* (*Penicillium purpurogenum*) *TpXynC* (AKH40280.1), *Bispora* sp. *XylD* (*BXylD*; ADG62369.1), *Trichoderma reesei* *XynVI* (*TrXynVI*; EGR45006.1), *T. reesei* *XynIV* (*TrXynIV*; AAP64786.1), *Acremonium alcalophilum* *AaXyn30A* [7], and *Talaromyces leycettanus* *TlXyn30A* [10]. The *SlXyn30A* amino acid numbering is shown in green at the bottom. Secondary structure elements and amino acid numbering of *TcXyn30B* is shown on top. Catalytic acid/base and catalytic nucleophile (in *SlXyn30A* Glu199 and Glu292, respectively) are violet highlighted. Conserved arginine (Arg46) which takes a part in MeGlcA recognition is typed in blue and is marked by a blue triangle. Extended region within a  $\beta$ 2- $\alpha$ 2 loop that is presumably responsible for xylobiohydrolase activity is yellow highlighted. Within the extended region an aspartic acid or an asparagine (Asn90) is often found and is typed in brown and marked by a brown triangle. The Asx residue (*TcXyn30B* Asn93 and *TtXyn30A* Asp78) has been demonstrated to be hydrogen bonded to Xylp moiety accommodated in the -2a subsite.

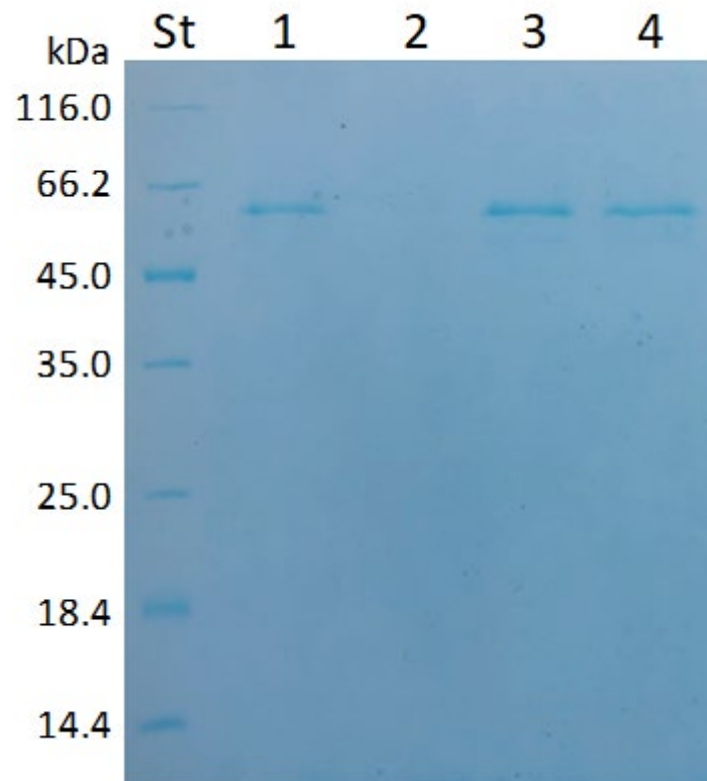

**Figure S2:** SDS-PAGE electrophoresis of recombinant *P.pastoris* fermentation broths after induction with methanol. St-MW standard, 1-4 fermentation broth of four transformants.
